# Supplementary material for: Ultrafine Fe nanoparticles embedded in N-doped carbon nanotubes derived from highly dispersed g-C3N4 nanofibers for the oxygen reduction reaction
Source: Royal Society of Chemistry journal article supplement (doi:10.1039/d1nj00529d), 2021-01-01
Supplement: d1nj00529d1.pdf [file d1nj00529d1.pdf]

## **New Journal of Chemistry**

### **Ultrafine Fe nanoparticles embedded in N-doped carbon nanotubes derived from highly dispersed g-C<sub>3</sub>N<sub>4</sub> nanofibers for oxygen reduction reaction**

Yue Ran, Li Quan, Jiayi Cui, Jianqiao Liu, Wei Lin Xuelian Yu\*, Lin Wang\*, Yihe Zhang

Beijing Key Laboratory of Materials Utilization of Nonmetallic Minerals and Solid Wastes, National Laboratory of Mineral Materials, School of Materials Science and Technology, China University of Geosciences, 100083, Beijing, China

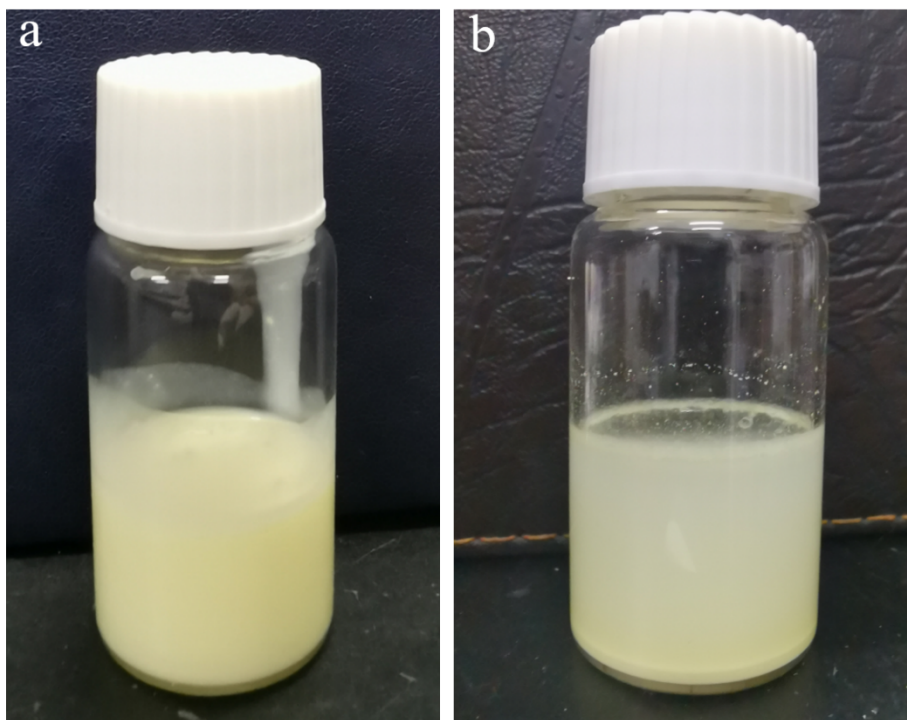

**Fig. S1.** The photographs of dispersion of h-CN (a) and bulk CN (b) in water.

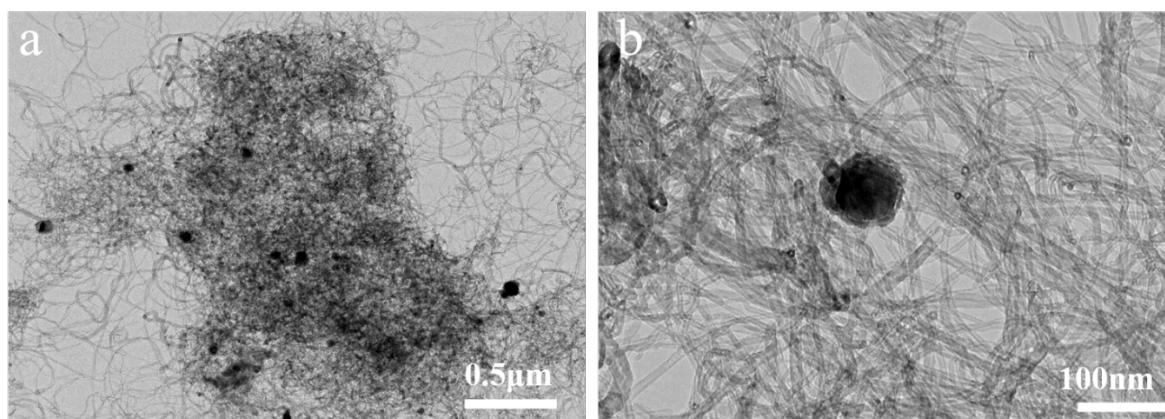

**Fig. S2.** TEM images of Fe@h-CN/CNT.

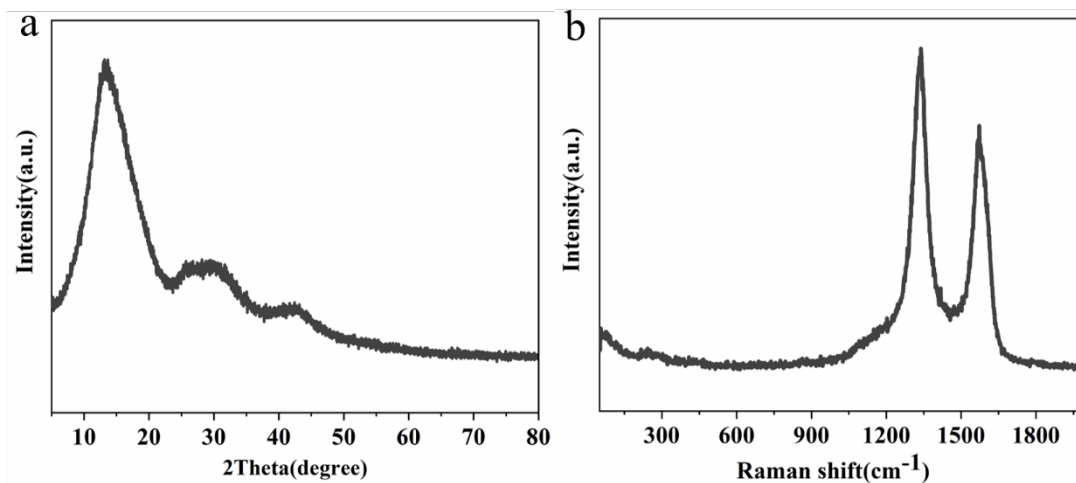

**Fig. S3.** XRD pattern (a) and Raman spectra (b) of Fe@h-CN/CNT.

**Table S1.** The amount of C, N and Fe in Fe@h-CN/CNT.

| element  | C     | N    | Fe   | O    |
|----------|-------|------|------|------|
| atomic % | 92.63 | 5.28 | 0.76 | 1.33 |

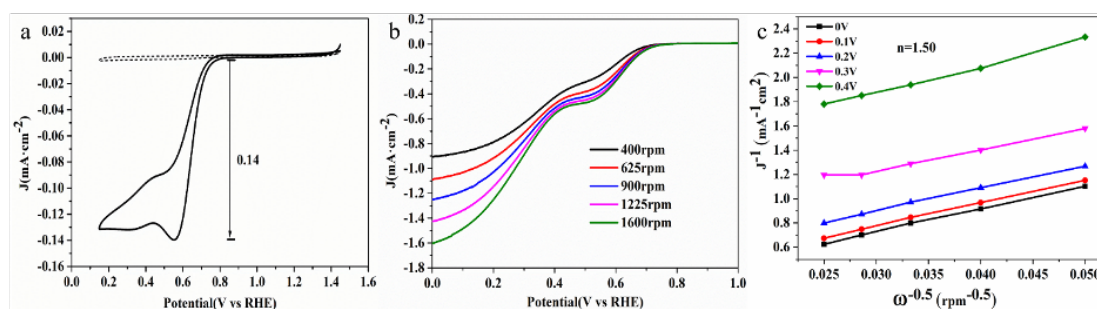

**Fig. S4.** CV curves (a), LSV curves (b) at different rotation rates, and K-L plots (c) of h-CN.

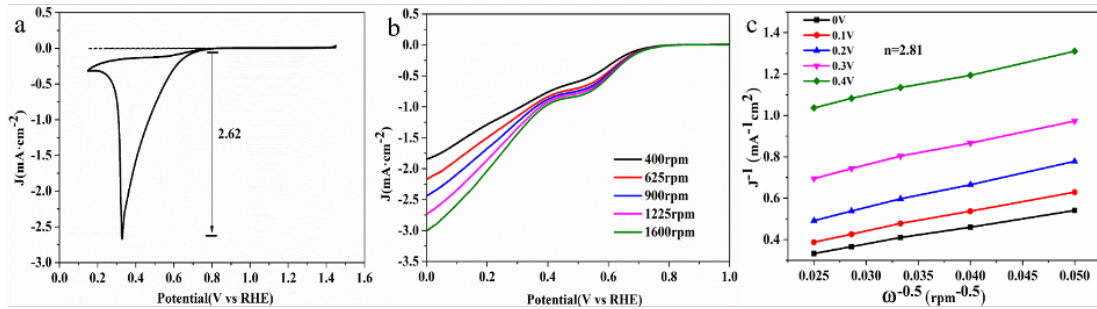

**Fig. S5.** CV curves (a), LSV curves (b) at different rotation rates, and K-L plots (c) of Fe@h-CN.

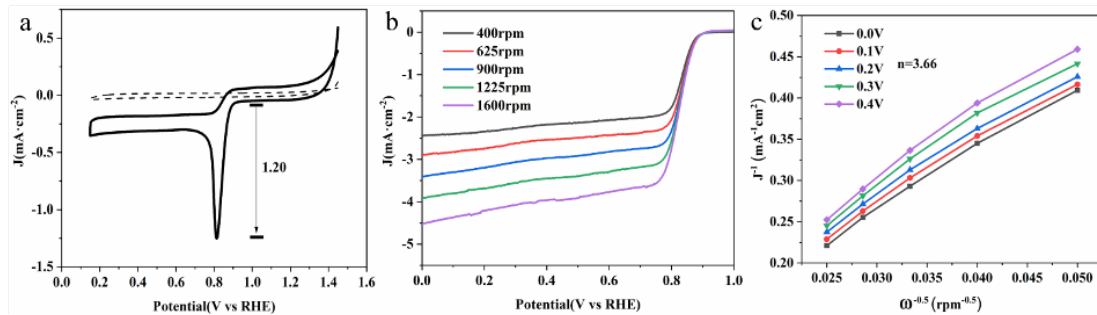

**Fig. S6.** CV curves (a), LSV curves (b) at different rotation rates, and K-L plots (c) of h-CN/CNT.

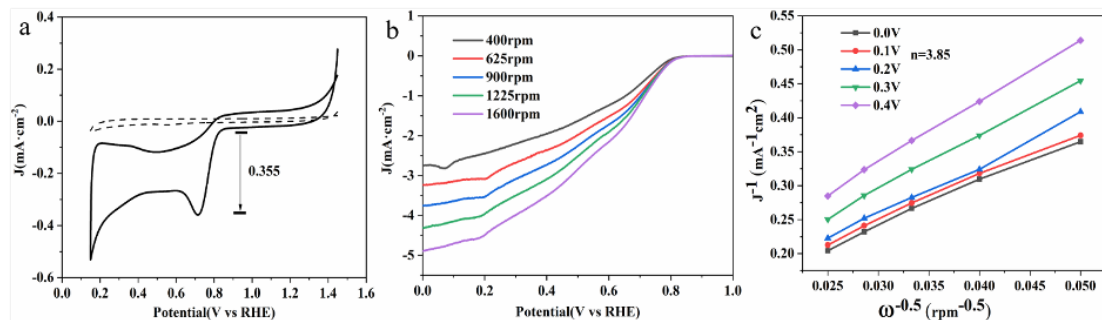

**Fig. S7.** CV curves (a), LSV curves (b) at different rotation rates, and K-L plots (c) of Fe-CNT.

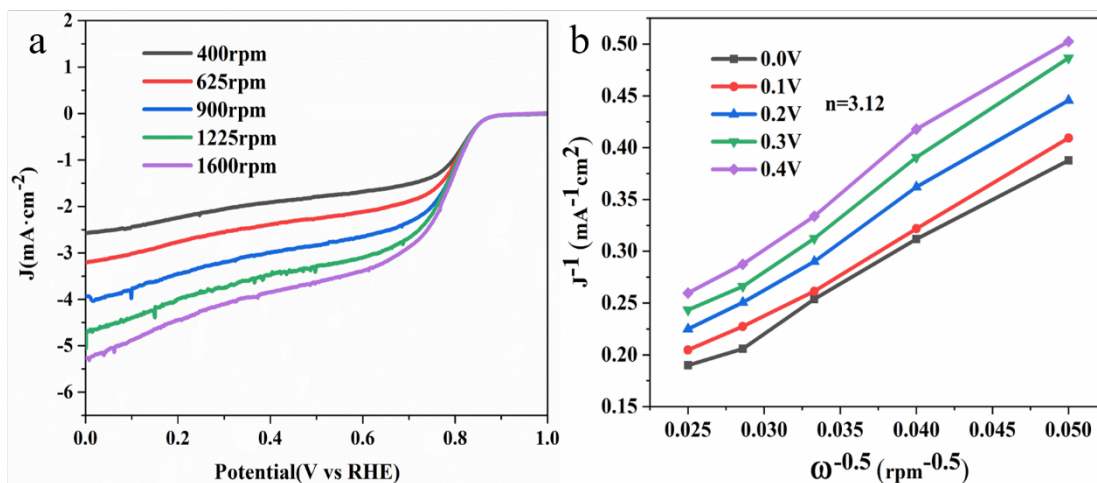

**Fig. S8.** LSV curves (a) at different rotation rates, and K-L plots (b) of Fe@CN/CNT.

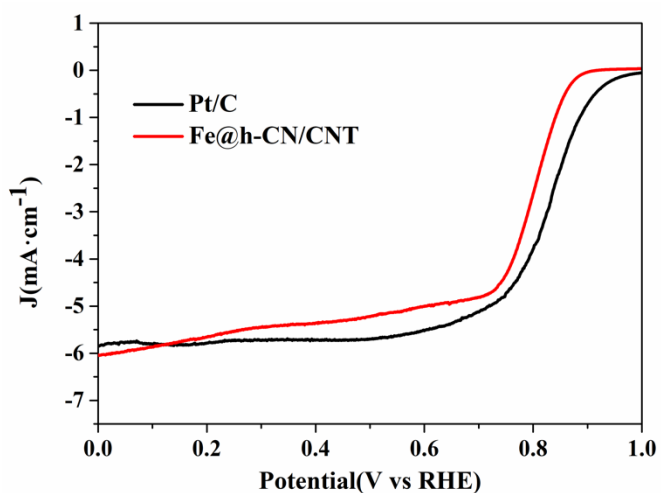

**Fig. S9.** LSV curves of Fe@h-CN/CNT and 20 % Pt/C in  $\text{O}_2$  saturated KOH solution with the rotation speed of 1600 rpm

**Table S2.** Comparison of ORR performance of Fe@h-CN/CNT with the state-of-the-art catalysts in 0.1 M KOH solution.

| Samples                                 | $E_{\text{onset}}$ (V vs RHE) | $E_{1/2}$ (V vs RHE) | $j_d$ (mA·cm <sup>-2</sup> ) | Ref.      |
|-----------------------------------------|-------------------------------|----------------------|------------------------------|-----------|
| Co/NHPC                                 | 0.89                          | 0.826                | -5.4                         | 1         |
| NC@Co-NGC DSNCs                         | 0.92                          | 0.82                 | -5.25                        | 2         |
| Po-FePhen-C                             | 0.91                          | 0.84                 | -5.8                         | 3         |
| 3D-Fe/N/C                               | 0.97                          | 0.84                 | -6.68                        | 4         |
| Co@NC@CNTs                              | 0.90                          | 0.82                 | -5.4                         | 5         |
| Fe <sub>2</sub> C@Fe/N-C                | 0.967                         | 0.81                 | -5.49                        | 6         |
| S-rGO                                   | 0.74                          | 0.6                  | -2.3                         | 7         |
| Co@Co <sub>3</sub> O <sub>4</sub> @C-CM | 0.85                          | 0.70                 | -4.6                         | 8         |
| V-NiCo@NG                               | 0.87                          | 0.78                 | -3.8                         | 9         |
| Cubic-9/C                               | 0.75                          | 0.67                 | -5.5                         | 10        |
| Fe@h-CN/CNT                             | 0.90                          | 0.80                 | -6.04                        | this work |

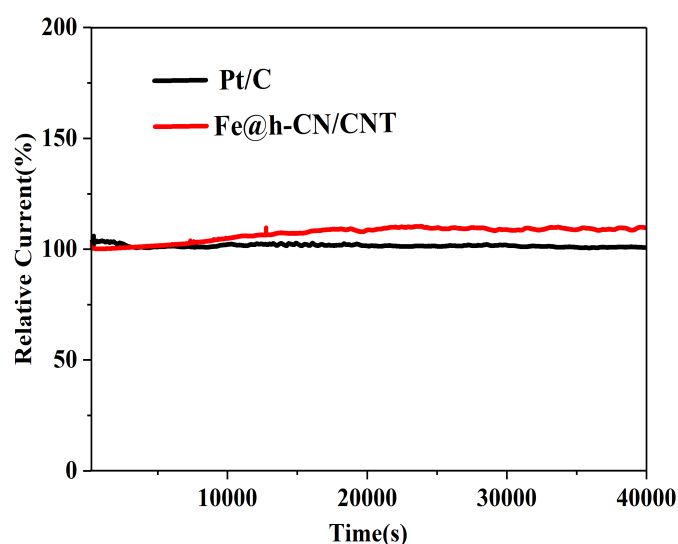

**Fig. S10.** I-t curves to determine the stability of Fe@h-CN/CNT and 20 % Pt/C.

**Table S3.** The surface area of Fe@h-CN/CNT and Fe@CN/CNT.

---

| Sample      | Surface area (m <sup>2</sup> /g) |
|-------------|----------------------------------|
| Fe@h-CN/CNT | 193.127                          |
| Fe@CN/CNT   | 101.292                          |

---

## REFERENCES

- [1] C. Zhang, J. Shu, S. Shi, J. Nie, G. Ma, *J. Colloid. Interface. Sci.* 2020, 559, 21-28.
- [2] S. Liu, Z. Wang, S. Zhou, F. Yu, M. Yu, C.Y. Chiang, W. Zhou, J. Zhao, J. Qiu, *Adv. Mater.* 2017, 29, 1700874.
- [3] A. Serov, K. Artyushkova, P. Atanassov, *Adv. Energy Mater.* 2014, 4, 1301735.
- [4] Y. Li, W. Liao, Z. Li, T. Feng, L. Sun, C. Guo, J. Zhang, J. Li, *Carbon*, 2017, 125, 640-648.
- [5] M. Cochet, G. Louarn, S. Quillard, J.P. Buisson, S. Lefrant, Part II, *J. Raman. Spectrosc.* 2000, 31, 1041-1049.
- [6] D. Liu, L. Fu, X. Huang, K. Liu, J. Li, H. Xie, H. Wang, Y. Tang, *J. Electrochem. Soc.* 2018, 165, F662-F670.
- [7] H. Zhu, Z. Sun, M. Chen, H. Cao, K. Li, Y. Cai, F. Wang, *Electrochim. Acta*, 2017, 236, 154-160.
- [8] W. Xia, R. Zou, L. An, D. Xia, S. Guo, *Energy Environ. Sci.* 2015, 8, 568-576.
- [9] B. Zheng, Y. Zhou, C. Yu, S. Liu, Z. Pan, X. Wang, G. Liu, L. Lang, *J. Mater. Sci.* 2020, 55, 15454–1546.
- [10] B. Li, Y. Zhang, R. Du, L. Liu, X. Yu, *Nanotechnology*, 2018, 29, 105401.
